# Supplementary material for: Electrospun Silica-Polyacrylonitrile Nanohybrids for Water Treatments
Source: MDPI journal article supplement (doi:10.3390/membranes13010072), 2023-01-06
Supplement: s1 [file s1]

# Electrospun Silica-Polyacrylonitrile Nanohybrids for Water Treatments

Beata Malczewska <sup>1,\*</sup>, Paweł Lochyński <sup>1</sup>, Sylwia Charazińska <sup>1</sup>, Andrzej Sikora <sup>2</sup> and Ramin Farnood <sup>3</sup>

<sup>1</sup> Institute of Environmental Engineering, Wrocław University of Environmental and Life Sciences, pl. Grunwaldzki 24, 50-365 Wrocław, Poland; pawel.lochynski@upwr.edu.pl (P.L.); sylwia.charazinska@upwr.edu.pl (S.C.)

<sup>2</sup> Department of Nanometrology, Faculty of Electronics, Photonics and Microsystems, Wrocław University of Science and Technology, 50-372 Wrocław, Poland; andrzej.sikora@pwr.edu.pl

<sup>3</sup> Department of Chemical Engineering & Applied Chemistry, Faculty of Applied Science & Engineering, University of Toronto, 200 College St, Toronto, ON M5S 3E5, Canada; ramin.farnood@utoronto.ca

\* Correspondence: beata.malczewska@upwr.edu.pl

**Table S1.** AFM individual measurements of single fiber fragments: (a), (c), (e), (g), and (i) PAN membranes; (b), (d), (f), (h), and (j) PAN-Si membranes.

| (a) PAN membrane                                                                    |                                            | (b) PAN-Si membrane                                                                  |                                            |
|-------------------------------------------------------------------------------------|--------------------------------------------|--------------------------------------------------------------------------------------|--------------------------------------------|
| 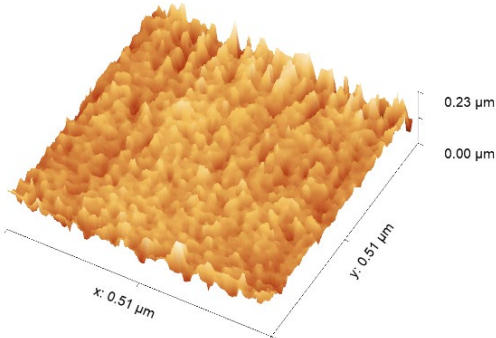 |                                            |  |                                            |
| <b>Statistical Quantities</b>                                                       |                                            | <b>Statistical Quantities</b>                                                        |                                            |
| Average value:                                                                      | 134.549 nm                                 | Average value:                                                                       | 115.803 nm                                 |
| RMS roughness (Sq):                                                                 | 18.7042 nm                                 | RMS roughness (Sq):                                                                  | 23.0488 nm                                 |
| RMS (grain-wise):                                                                   | 18.7042 nm                                 | RMS (grain-wise):                                                                    | 23.0488 nm                                 |
| Mean roughness (Sa):                                                                | 13.9075 nm                                 | Mean roughness (Sa):                                                                 | 18.1009 nm                                 |
| Skew (Ssk):                                                                         | −0.346433                                  | Skew (Ssk):                                                                          | −0.462895                                  |
| Excess kurtosis:                                                                    | 2.55043                                    | Excess kurtosis:                                                                     | 0.583787                                   |
| Projected area:                                                                     | 257,874 nm <sup>2</sup>                    | Projected area:                                                                      | 0.25787 μm <sup>2</sup>                    |
| Surface area:                                                                       | 853,566 nm <sup>2</sup>                    | Surface area:                                                                        | 1.10023 μm <sup>2</sup>                    |
| Surface slope (Sdq):                                                                | 4.44792                                    | Surface slope (Sdq):                                                                 | 5.80853                                    |
| Volume:                                                                             | 34.6967 × 10 <sup>−21</sup> m <sup>3</sup> | Volume:                                                                              | 29.8625 × 10 <sup>−21</sup> m <sup>3</sup> |

(c) PAN membrane

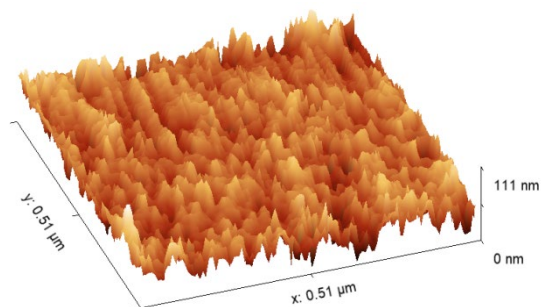

(d) PAN-Si membrane

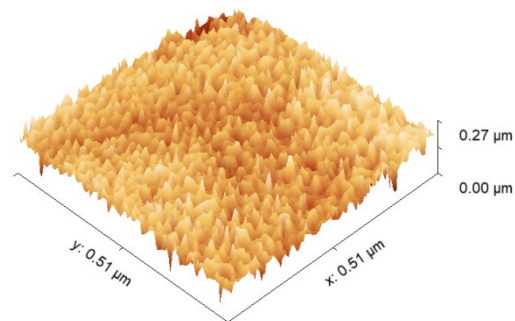

## Statistical Quantities

|                      |                          |
|----------------------|--------------------------|
| Average value:       | 49.814 nm                |
| RMS roughness (Sq):  | 12.0975 nm               |
| RMS (grain-wise):    | 12.0975 nm               |
| Mean roughness (Sa): | 9.4858 nm                |
| Skew (Ssk):          | $7.50480 \times 10^{-3}$ |
| Excess kurtosis:     | 0.483549                 |

|                      |                                          |
|----------------------|------------------------------------------|
| Projected area:      | 261,856 nm <sup>2</sup>                  |
| Surface area:        | 712,632 nm <sup>2</sup>                  |
| Surface slope (Sdq): | 3.27822                                  |
| Volume:              | $13.0440 \times 10^{-21}$ m <sup>3</sup> |

## Statistical Quantities

|                      |            |
|----------------------|------------|
| Average value:       | 161.991 nm |
| RMS roughness (Sq):  | 31.7688 nm |
| RMS (grain-wise):    | 31.7688 nm |
| Mean roughness (Sa): | 24.1850 nm |
| Skew (Ssk):          | -0.486780  |
| Excess kurtosis:     | 1.20452    |

|                      |                                          |
|----------------------|------------------------------------------|
| Projected area:      | 0.26186 μm <sup>2</sup>                  |
| Surface area:        | 1.78483 μm <sup>2</sup>                  |
| Surface slope (Sdq): | 9.00439                                  |
| Volume:              | $42.4183 \times 10^{-21}$ m <sup>3</sup> |

(e) PAN membrane

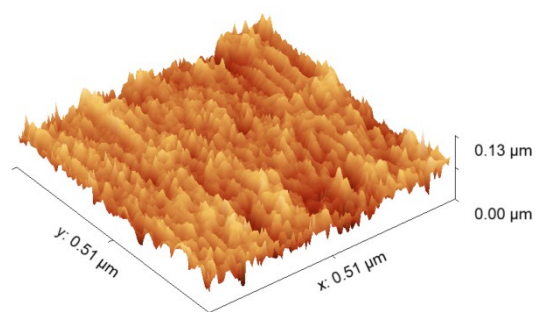

(f) PAN-Si membrane

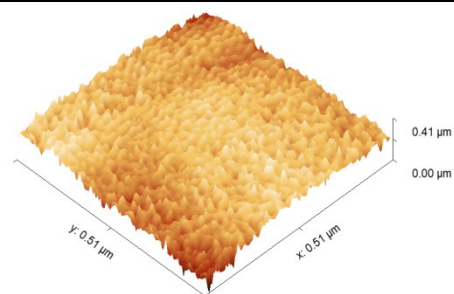

## Statistical Quantities

|                      |            |
|----------------------|------------|
| Average value:       | 64.863 nm  |
| RMS roughness (Sq):  | 13.4755 nm |
| RMS (grain-wise):    | 13.4755 nm |
| Mean roughness (Sa): | 10.5473 nm |
| Skew (Ssk):          | −0.179237  |
| Excess kurtosis:     | 0.296227   |

|                      |                                       |
|----------------------|---------------------------------------|
| Projected area:      | 261,856 nm <sup>2</sup>               |
| Surface area:        | 774,965 nm <sup>2</sup>               |
| Surface slope (Sdq): | 3.60174                               |
| Volume:              | $16.9848 \times 10^{-21} \text{ m}^3$ |

## Statistical Quantities

|                      |            |
|----------------------|------------|
| Average value:       | 262.491 nm |
| RMS roughness (Sq):  | 41.4914 nm |
| RMS (grain-wise):    | 41.4914 nm |
| Mean roughness (Sa): | 32.0846 nm |
| Skew (Ssk):          | −0.503540  |
| Excess kurtosis:     | 0.886592   |

|                      |                                       |
|----------------------|---------------------------------------|
| Projected area:      | 0.26186 μm <sup>2</sup>               |
| Surface area:        | 1.88802 μm <sup>2</sup>               |
| Surface slope (Sdq): | 9.42221                               |
| Volume:              | $68.7349 \times 10^{-21} \text{ m}^3$ |

(g) PAN membrane

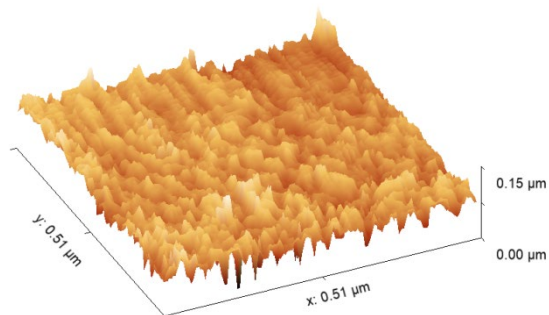

(h) PAN-Si membrane

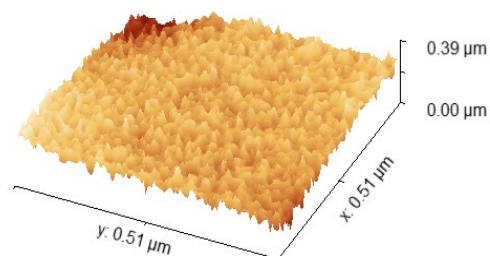

## Statistical Quantities

|                      |                                       |
|----------------------|---------------------------------------|
| Average value:       | 82.114 nm                             |
| RMS roughness (Sq):  | 11.5133 nm                            |
| RMS (grain-wise):    | 11.5133 nm                            |
| Mean roughness (Sa): | 8.9604 nm                             |
| Skew (Ssk):          | 0.0910920                             |
| Excess kurtosis:     | 1.07171                               |
| Projected area:      | 261,856 nm <sup>2</sup>               |
| Surface area:        | 682,607 nm <sup>2</sup>               |
| Surface slope (Sdq): | 3.16464                               |
| Volume:              | $21.5021 \times 10^{-21} \text{ m}^3$ |

## Statistical Quantities

|                      |                                       |
|----------------------|---------------------------------------|
| Average value:       | 239.720 nm                            |
| RMS roughness (Sq):  | 38.8378 nm                            |
| RMS (grain-wise):    | 38.8378 nm                            |
| Mean roughness (Sa): | 28.1871 nm                            |
| Skew (Ssk):          | -1.01578                              |
| Excess kurtosis:     | 2.61707                               |
| Projected area:      | 0.26186 μm <sup>2</sup>               |
| Surface area:        | 1.76057 μm <sup>2</sup>               |
| Surface slope (Sdq): | 8.85958                               |
| Volume:              | $62.7722 \times 10^{-21} \text{ m}^3$ |

(i) PAN membrane

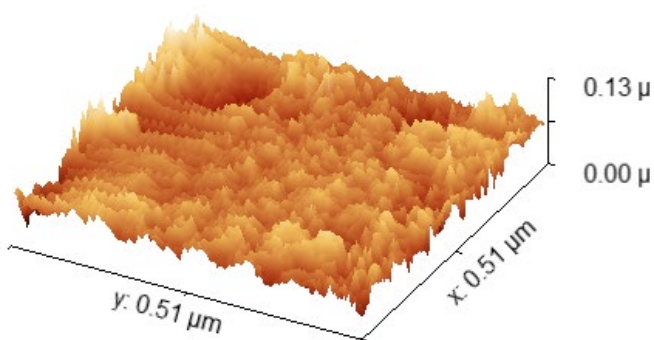

(j) PAN-Si membrane

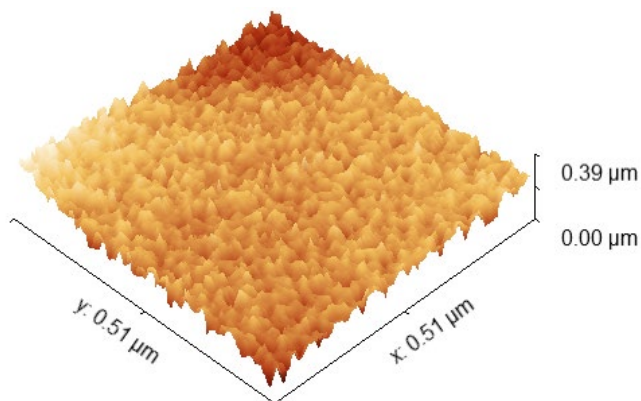

## Statistical Quantities

|                      |                           |
|----------------------|---------------------------|
| Average value:       | 67.237 nm                 |
| RMS roughness (Sq):  | 13.5971 nm                |
| RMS (grain-wise):    | 13.5971 nm                |
| Mean roughness (Sa): | 10.3022 nm                |
| Skew (Ssk):          | $-25.8007 \times 10^{-3}$ |
| Excess kurtosis:     | 1.07242                   |

|                      |                                          |
|----------------------|------------------------------------------|
| Projected area:      | 261,856 nm <sup>2</sup>                  |
| Surface area:        | 701,993 nm <sup>2</sup>                  |
| Surface slope (Sdq): | 3.22295                                  |
| Volume:              | $17.6063 \times 10^{-21}$ m <sup>3</sup> |

## Statistical Quantities

|                      |            |
|----------------------|------------|
| Average value:       | 224.321 nm |
| RMS roughness (Sq):  | 37.6789 nm |
| RMS (grain-wise):    | 37.6789 nm |
| Mean roughness (Sa): | 28.3934 nm |
| Skew (Ssk):          | -0.278625  |
| Excess kurtosis:     | 1.13166    |

|                      |                                          |
|----------------------|------------------------------------------|
| Projected area:      | 0.26186 μm <sup>2</sup>                  |
| Surface area:        | 1.73121 μm <sup>2</sup>                  |
| Surface slope (Sdq): | 8.64715                                  |
| Volume:              | $58.7399 \times 10^{-21}$ m <sup>3</sup> |
